# Supplementary material for: Type II Interleukin-4 Receptor Activation in Basal Breast Cancer Cells Promotes Tumor Progression via Metabolic and Epigenetic Modulation
Source: MDPI journal article supplement (doi:10.3390/ijms25094647), 2024-04-24
Supplement: s1 [file s1]

**A****Overall Survival**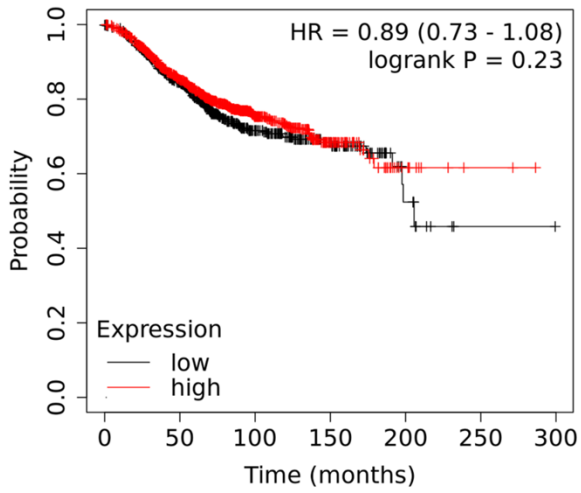**B****Overall Survival**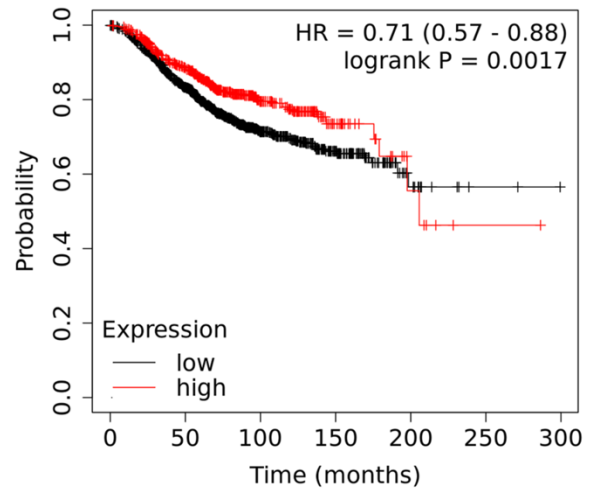

**Figure S1. Type I IL4 receptor subunits do not correlate with decreased survival in breast cancer.** High expression of neither IL4R (A) nor IL2RG (B) correlates with reduced survival in breast cancer patients that are not stratified by subtype (n=1879). Figure created with KMPlotter.

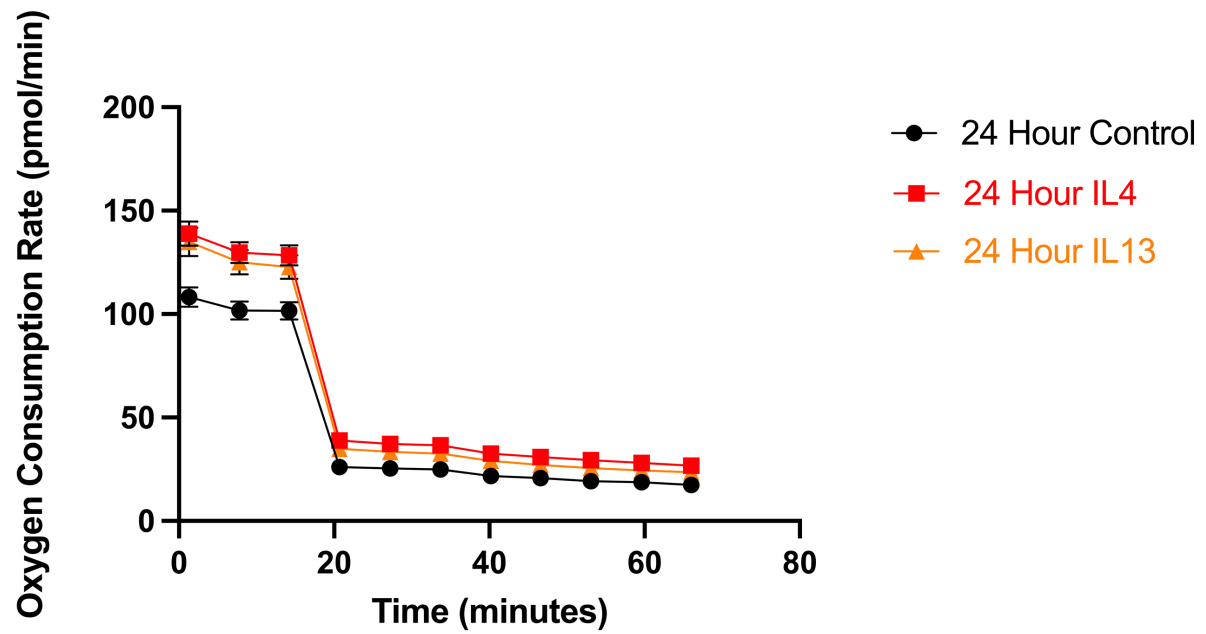

**Figure S2. Type II IL4 receptor stimulation increased oxygen consumption rate in BT549 cells, as assessed by Seahorse glycolytic rate assay.**

Supplemental Table S1: Primer sequences

| Gene Target | Forward Primer (5' - 3') | Reverse Primer (5' - 3') |
|-------------|--------------------------|--------------------------|
| 18S         | CCAGGTCCTAGCAATGGTC      | AAGTGACGCAGCCCTCTATG     |
| BCL2        | GGTGGGGTCATGTGTGTGG      | CGGTTCAAGTACTCAGTCATCC   |
| CCND2       | ACCTTCCGCAGTGCTCCTA      | CCCAGCCAAGAAACGGTCC      |
| EP300       | AGCCAAGCGGCCTAAACTC      | TCACCACCATTTGGTTAGTCCC   |
| ST8SIA1     | GGAAATGGTGGGATTCTGAAG    | TGACAAAGGAGGGAGATTGC     |
